# Supplementary material for: Identifying multimorbidity clusters among Brazilian older adults using network analysis: Findings and perspectives
Source: PLOS journal article supplement (doi:10.1371/journal.pone.0271639), 2022-07-20
Supplement: S2 (10.1371/journal.pone.0271639.s002) [file journal.pone.0271639.s002]

**S2 Table. Prevalence of dyads ( $\geq 10\%$ ) and triads ( $\geq 5\%$ ) of morbidities in Brazilian older adults. National Health Survey (PNS-Brazil), n = 11,177. Brazil, 2013.**

| <b>Pairs</b>                                | <b>%</b> |
|---------------------------------------------|----------|
| Hypertension/Hypercholesterolemia           | 16.9     |
| Hypertension/Back pain                      | 16.3     |
| Hypertension/Obesity                        | 15.1     |
| Hypertension/Diabetes                       | 12.9     |
| Hypertension/Arthritis-rheumatism           | 10.4     |
| <b>Triads</b>                               | <b>%</b> |
| Hypertension/Back pain/Hypercholesterolemia | 6.6      |
| Hypertension/Hypercholesterolemia/Diabetes  | 6.0      |
| Hypertension/Back pain/Obesity              | 5.8      |
| Hypertension/Back pain/Arthritis-rheumatism | 5.7      |
| Hypertension/Hypercholesterolemia /Obesity  | 5.6      |
